# Supplementary material for: Assessing Gut Microbiota in an Infant with Congenital Propionic Acidemia before and after Probiotic Supplementation
Source: MDPI journal article supplement (doi:10.3390/microorganisms9122599), 2021-12-16
Supplement: s1 [file s1]

# Assessing gut microbiota in an infant with congenital propionic acidemia before and after probiotic supplementation

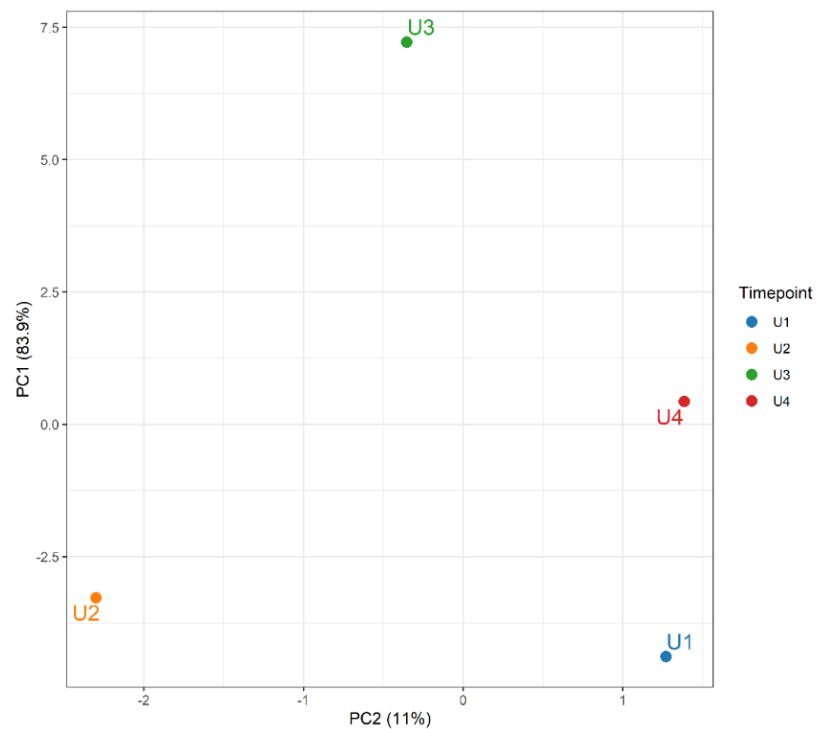

**Supplementary Figure S1.** Scatter plot of the first two principal components (PC1 and PC2) from the principal component analysis (PCA) of urine samples U1-U4.

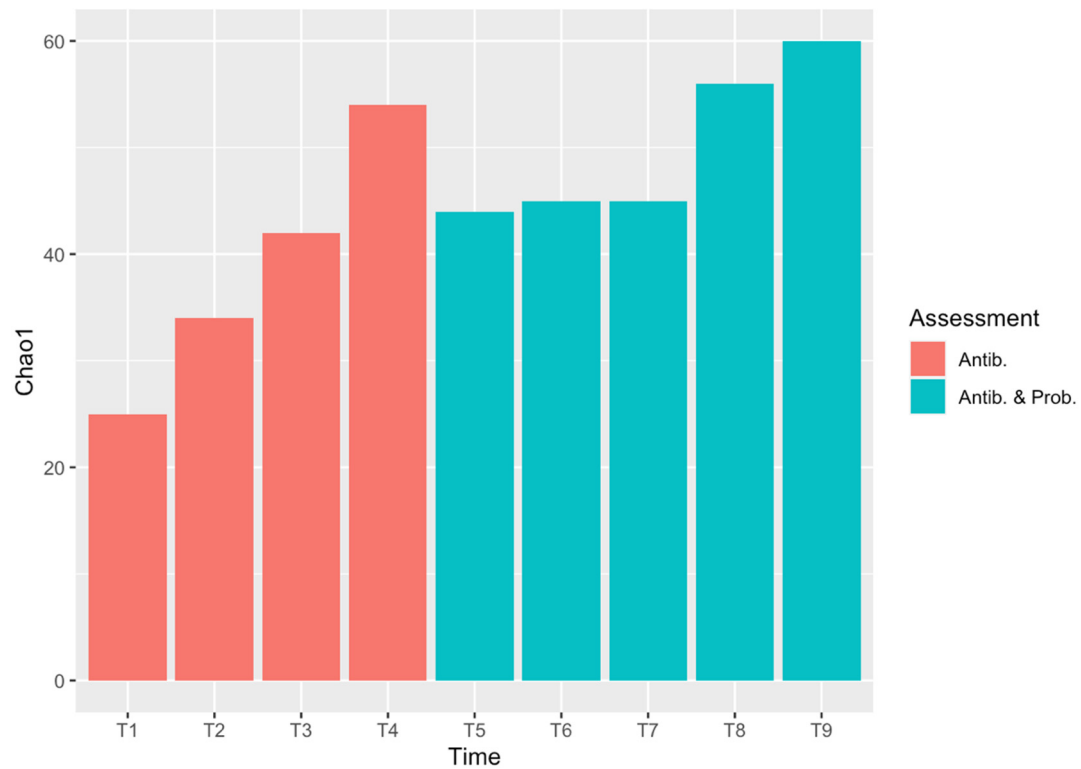

**Supplementary Figure S2.** Alpha diversity analysis of metabarcoding sequencing data. Alpha-diversity was performed using the “estimate\_richness” function implemented in phyloseq estimated using the Chao1 metric. Salmon orange bars are related to samples T1-T4, collected at first month of life and associated to antibiotic treatment. Turquoise bars are related to samples T5-T9, collected at 4 months of life and associated to both antibiotic treatment and probiotic supplementation.

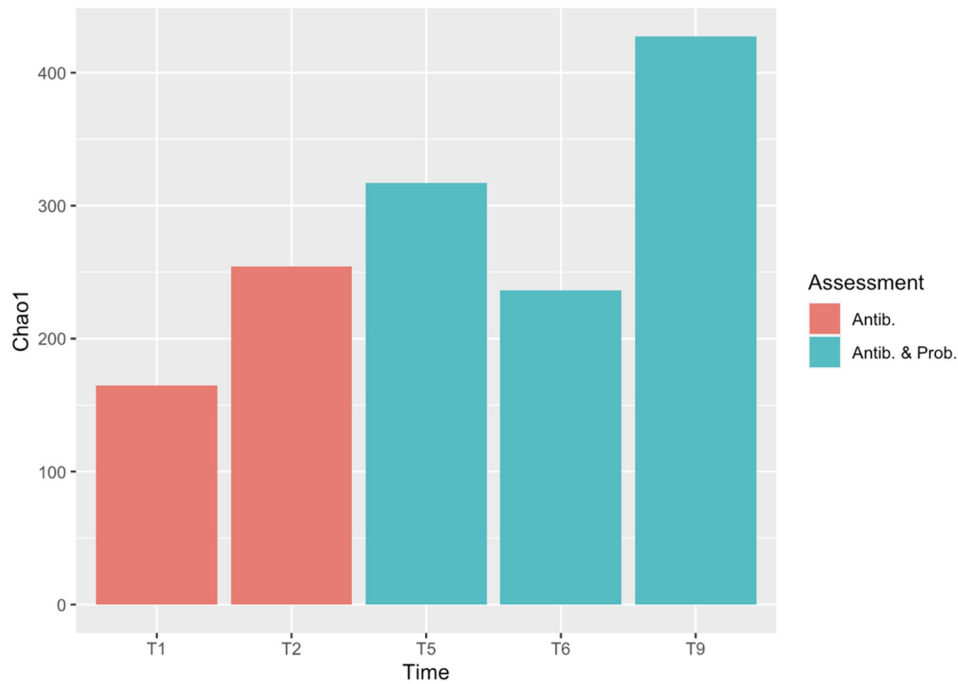

(a)

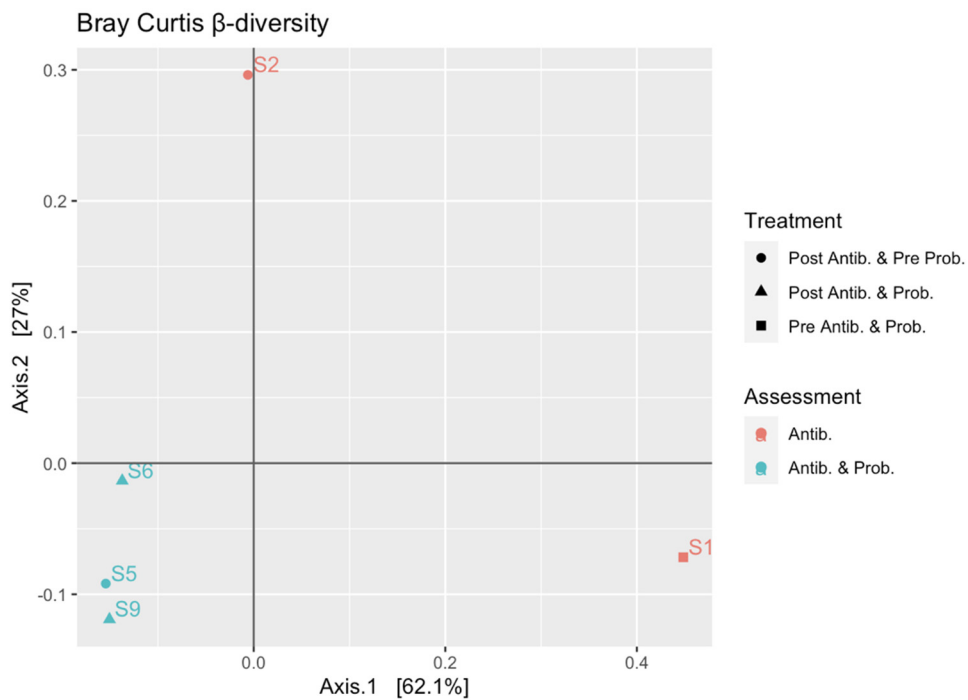

(b)

**Supplementary Figure S3.** Alpha (a) and Beta (b) diversity analysis of low coverage whole metagenome sequencing data. Alpha-diversity (a) was performed using the “estimate\_richness” function implemented in phyloseq estimated using the Chao1 metric. Salmon orange bars are related to samples T1-T2, collected at first month of life and associated to antibiotic treatment. Turquoise bars are related to samples T5-T9, collected at 4 months of life and associated to both antibiotic treatment and probiotic supplementation. Beta diversity (b) rarefaction was based on Bray-Curtis distance metric using “plot\_ordination”. Shapes indicates the type of treatment: circles are related to samples collected after antibiotic treatment and before the probiotic supplementation (S2 and S5); triangles are related to samples collected after antibiotic treatment and probiotic supplementation (S6 and S9); squares are related to samples collected before antibiotic treatment and probiotic supplementation (S1). Colors indicate the two phases of the study: salmon orange is related to samples S1 and S2 collected at first month of life and associated to antibiotic treatment; turquoise is related to samples S5, S6 and S9 collected at 4 months of life and associated to antibiotic treatment and probiotic supplementation.

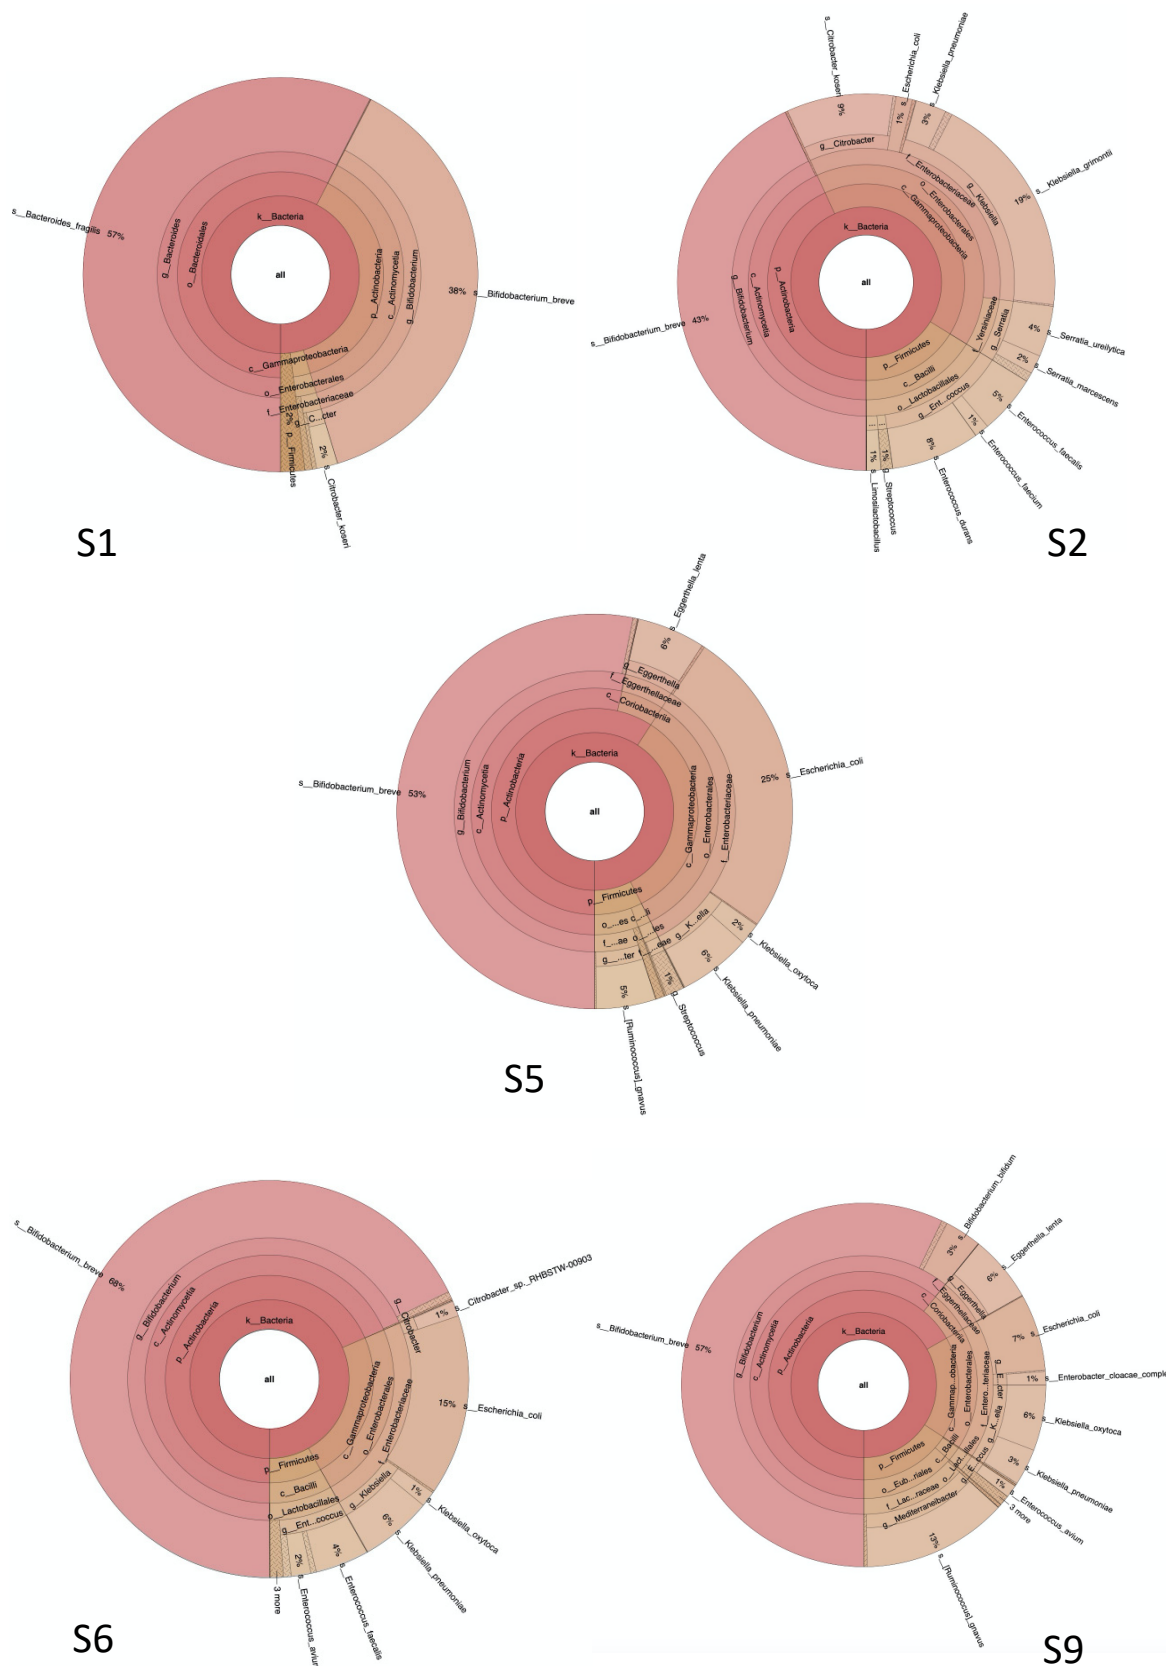

**Supplementary Figure S4.** Microbiota structure assessed with low coverage whole metagenome sequencing. Sample S1 was collected at 1<sup>st</sup> month of life before the antibiotic therapy, sample S2 was collected at 1<sup>st</sup> month of life 1 day after the end of the treatment; sample S5 was collected at 4 months of life before the 5<sup>th</sup> antibiotic therapy, sample S6 was collected at 4 months of life 1 day after the end of 5<sup>th</sup> antibiotic therapy and at first day of probiotic supplementation, S9 was collected at 4 months of life 21 days after the end of 5<sup>th</sup> antibiotic therapy and at the end of probiotic supplementation.

As shown also for metabarcoding data (see main manuscript), *Bac. fragilis* dominated the gut microbiome in S1 with a relative abundance of 57%, followed by *Bif. breve* population (38%). Smaller fractions included members of *Proteobacteria* (*Citrobacter koseri*, 2%) and *Firmicutes* (2% of all), which were mostly represented by *Veillonella parvula* (1% of all) and members of *Lactobacillales* (mainly *Streptococcus* and *Enterococcus* spp.) (0,9% of all). In S2, *Bif. breve* was the most abundant member (43%), while *Bac. fragilis* was not detected. The *Enterobacteriaceae* represented the 34% of the total microbial population and it included members of genera *Klebsiella* (23%) (*K. oxytoca*, *K. michiganensis*, *K. pneumoniae*, *K. grimontii*, *K. variicola*), *Citrobacter* (*C. koseri*) (9%) and *Escherichia* (*E. coli*) (1%). Other *Proteobacteria* included *Serratia* species (*S. ureilytica*, *S. marcescens*) which represented 7% of the total population. Members of *Lactobacillales* constituted the 16% of the gut microbiota and they mainly comprised *Enterococcus* species (*E. durans*, *E. faecalis*, and *E. faecium*, with 8, 5 and 1% of total relative abundance, respectively), *Limosilactobacillus reuteri* (1%) and *Streptococcus* species (1%). As for S5, 59% of sample was covered by members of phylum *Actinobacteria*, and 53% was related to *Bif. breve* (0,6% of *Bif. longum* and 0,1% of *Bif. bifidum* were also detected) while the remaining 6% was related to *Eggerthella lenta*. *Enterobacteriaceae* spp. had a relative abundance of 33% and they were most represented by *E. coli* (25%) and *Klebsiella* spp. (*K. pneumoniae*, 6%; *K. oxytoca*, 2%); as for *Firmicutes* fraction (7% of all), it mainly included *Ruminococcus gnavus* (5% of all) and *Streptococcus* spp. (1%).

The relative abundance of *Actinobacteria* reached 69% in S6, with *Bif. breve* the most represented (68% of all). The population of *Enterobacteriaceae* slightly decreased compared to S5 (23%) while the *Firmicutes* (8% of all) mainly consisted of *Enterococcus faecalis* (4%), *Enterococcus avium* (2%) and *Streptococcus* spp. (0,9%). Similarly to S6, sample S9 was characterized by 67% of *Actinobacteria* (57% of *Bif. breve*, 6% *E. lenta*, and 3% *Bif. bifidum*). The relative abundance of *Firmicutes* increased to 16% of all, with *Ruminococcus gnavus* the main representative (13%) followed by *E. avium* (1%) and *Streptococcus* spp. (0,8%). *Enterobacteriaceae* decreased to 17% and they mainly included *E. coli* (7% of all), *Klebsiella* spp. (9% of all) (*K. pneumoniae* and *K. oxytoca*) and *Enterobacter cloacae* (1%).
